# Supplementary material for: An electrostatically self-assembled fluorinated molecule as a surface modification layer for a high-performance and stable triboelectric nanogenerator
Source: Royal Society of Chemistry journal article supplement (doi:10.1039/d0ta11596g), 2020-12-28
Supplement: d0ta11596g1.pdf [file d0ta11596g1.pdf]

## Electronic Supplementary Information

# Electrostatically self-assembled fluorinated molecule as a surface modification layer for high-performance and stable triboelectric nanogenerator

Jia-Ruei Yang,<sup>†a</sup> Chia-Jung Lee,<sup>†b</sup> Chih-Yu Chang\*<sup>a</sup>

<sup>a</sup> Department of Materials Science and Engineering, National Taiwan University of Science and Technology, Taipei 10607, Taiwan (R.O.C.) (E-mail: [cychang@gapps.ntust.edu.tw](mailto:cychang@gapps.ntust.edu.tw))

<sup>b</sup> Ph.D. Program in Clinical Drug Development of Herbal Medicine, College of Pharmacy, Taipei Medical University, Taipei, Taiwan

**Table S1.** Comparison of the output characteristics of state-of-the-art solution-based chemical-modified TENG as well as the present work.

| Source      | Modification method                | Contact area [cm <sup>2</sup> ] | Power density [W/m <sup>2</sup> ] | Durability [cycles] |
|-------------|------------------------------------|---------------------------------|-----------------------------------|---------------------|
| This work   | Electrostatic self-assembled layer | 25                              | 57.1                              | 240,000             |
| Reference 1 | Self-assembled monolayer           | 4                               | 55                                | 5,000               |
| Reference 2 | ICP etching, spin coating          | 16                              | 16.5                              | Not report          |
| Reference 3 | Bulk functionalities               | 4                               | 7.05                              | 10,800              |
| Reference 4 | Self-assembled monolayer           | 6                               | 1.8                               | 50,000              |
| Reference 5 | Asymmetric ion doping              | 4                               | 1.4                               | 30,000              |
| Reference 6 | Supramolecular self-assembly       | 6                               | 0.42                              | 50,000              |

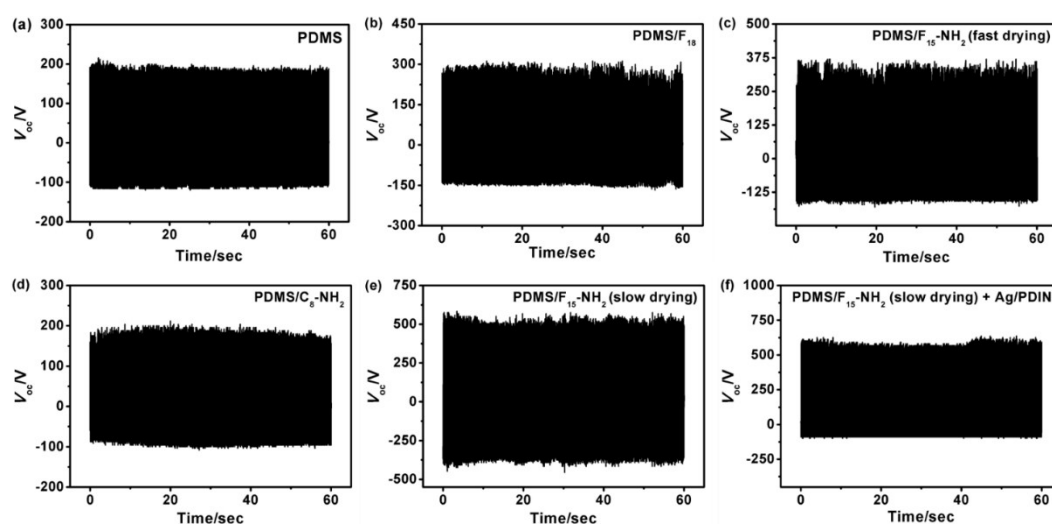

**Fig. S1**  $V_{oc}$  output of the of the as-fabricated TENG.

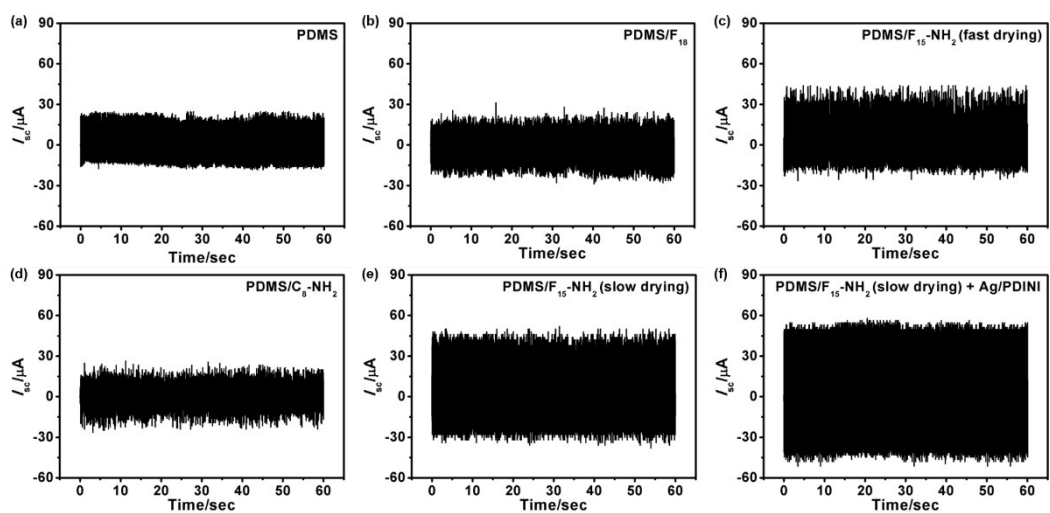

Fig. S2  $I_{sc}$  output of the as-fabricated TENG.

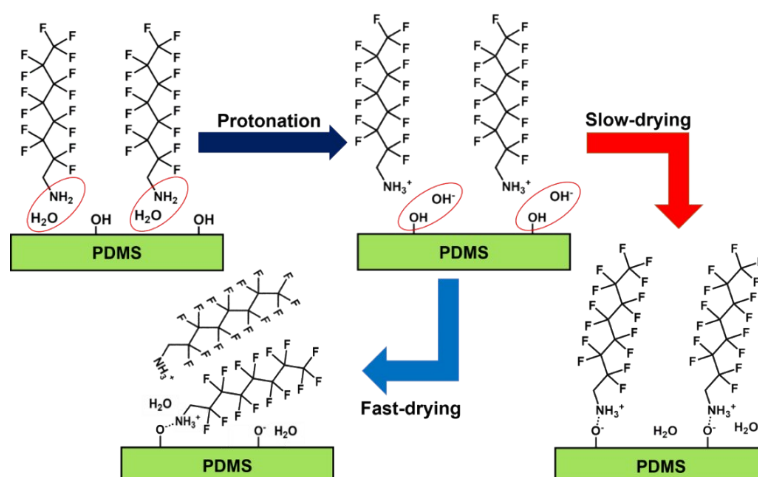

Fig. S3 Schematic illustration of the formation of  $F_{15}\text{-NH}_2$  layer on the PDMS surface via electrostatic self-assembly.

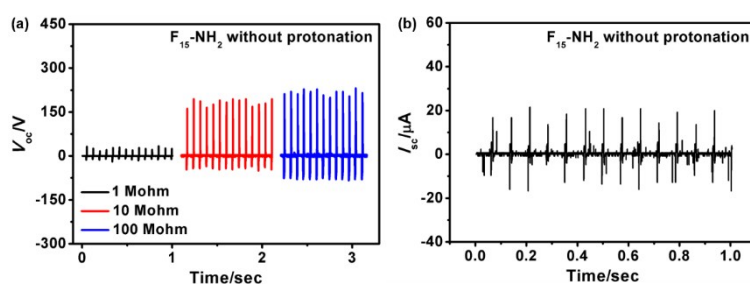

Fig. S4 Output characteristics of the as-fabricated TENG based on  $F_{15}\text{-NH}_2$  layer without protonation treatment.

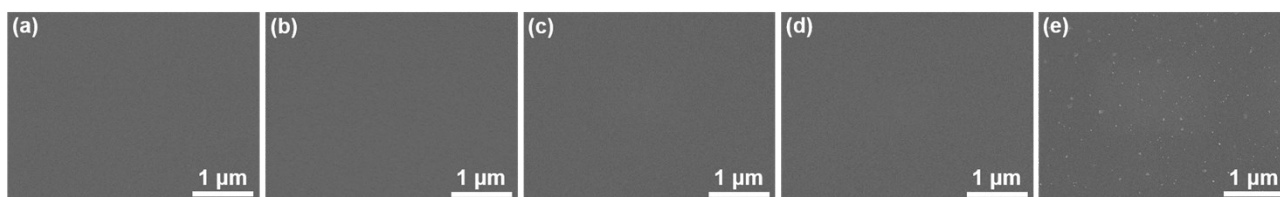

Fig. S5 Top view SEM images of dielectric layers: (a) bare PDMS, (b) PDMS/ $F_{18}$ , (c) PDMS/fast-dried  $F_{15}\text{-NH}_2$ , (d) PDMS/ $C_8\text{-NH}_2$ , (e) PDMS/slow-dried  $F_{15}\text{-NH}_2$ .

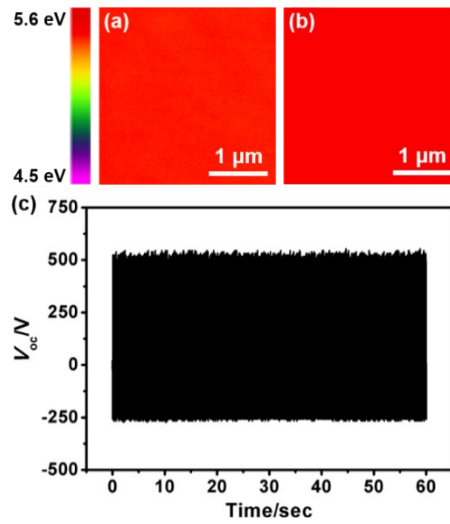

**Fig. S6** KPFM images of PMDS layer functionalized with F<sub>15</sub>-NH<sub>2</sub>: (a) before and (b) after rinsing with dimethyl sulfoxide. (c) V<sub>oc</sub> output of the as-fabricated TENG based on F<sub>15</sub>-NH<sub>2</sub> layer that is rinsed with dimethyl sulfoxide.

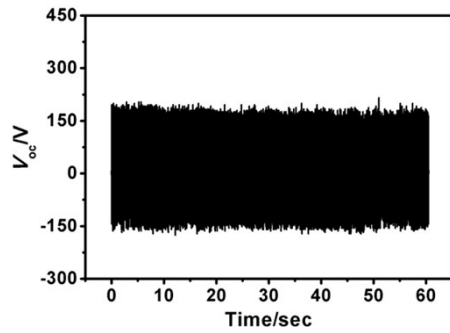

**Fig. S7** V<sub>oc</sub> output of the as-fabricated TENG based on F<sub>18</sub> layer that is rinsed with n-heptane.

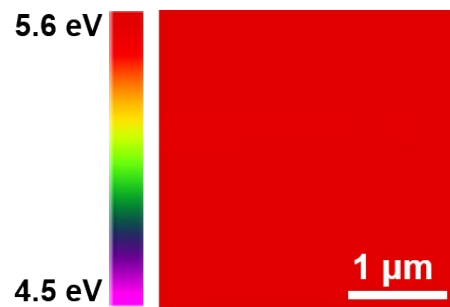

**Fig. S8** KPFM image of PMDS layer functionalized with F<sub>15</sub>-NH<sub>2</sub> after 100,000 working cycles.

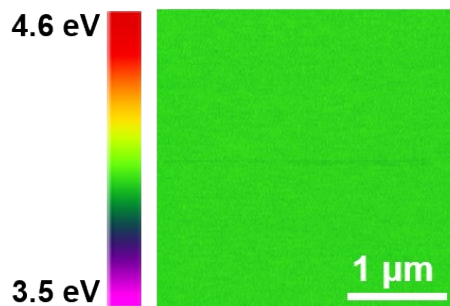

**Fig. S9** KPFM image of Al layer

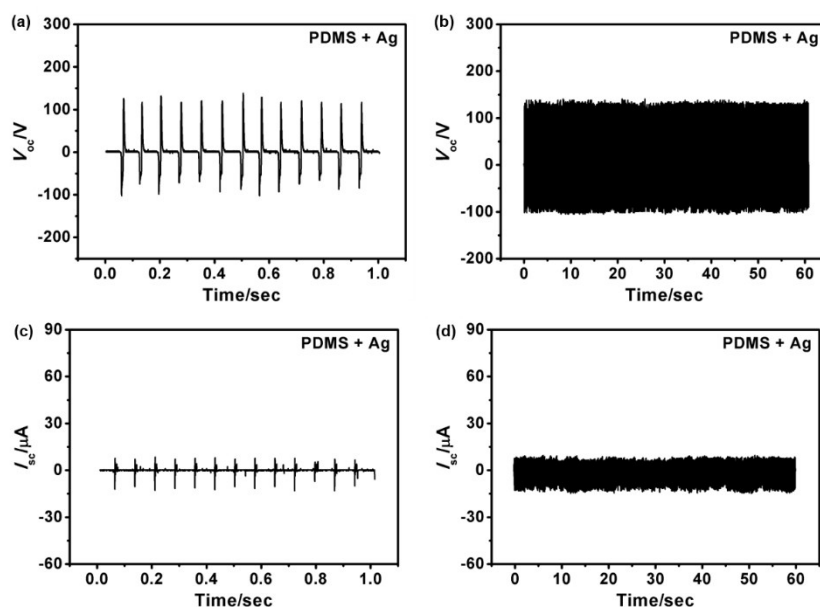

Fig. S10 Output characteristics of the as-fabricated TENG. Note that the electrode is Ag layer.

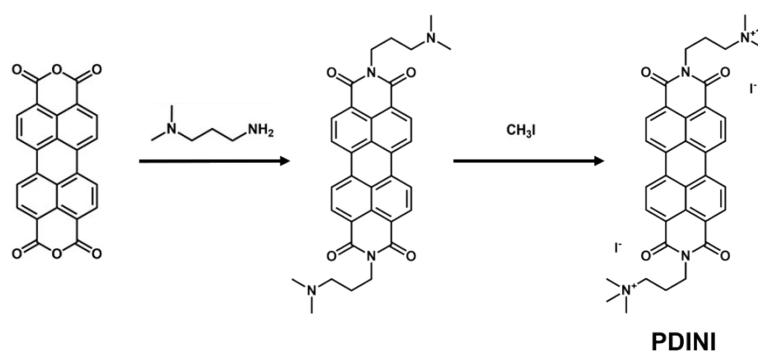

Fig. S11 Synthesis scheme for the preparation of PDINI.

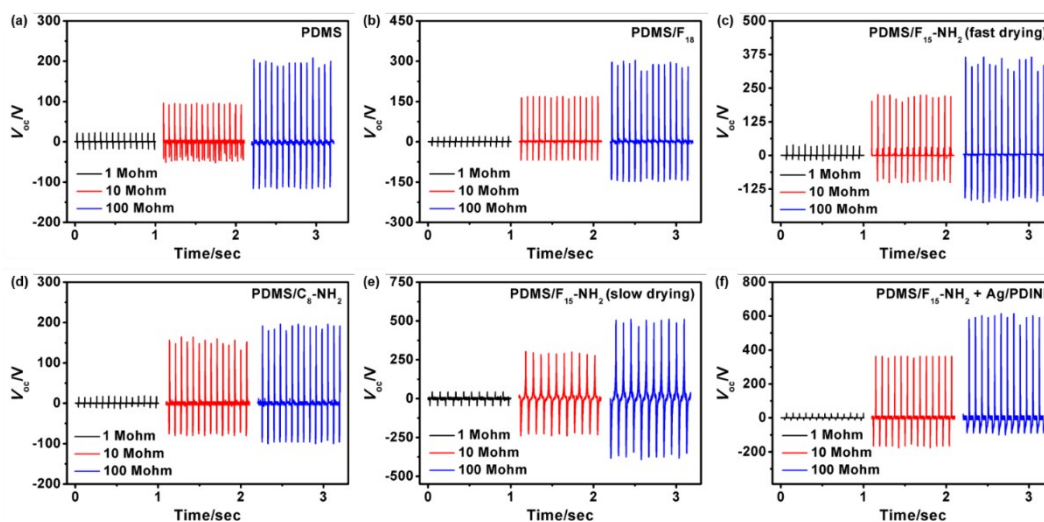

Fig. S12  $V_{oc}$  output of the as-fabricated TENG measured under different load resistances.

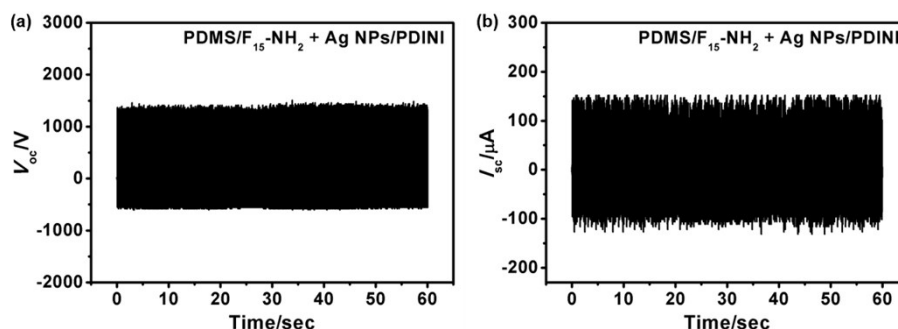

Fig. S13 Output characteristics of the as-fabricated TENG with  $F_{15}\text{-NH}_2$  and PDINI modification.

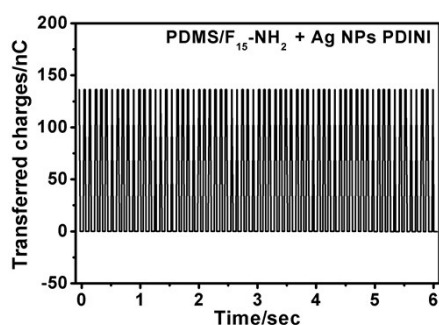

Fig. S14 Transferred charges of the as-fabricated TENG with  $F_{15}\text{-NH}_2$  and PDINI modification.

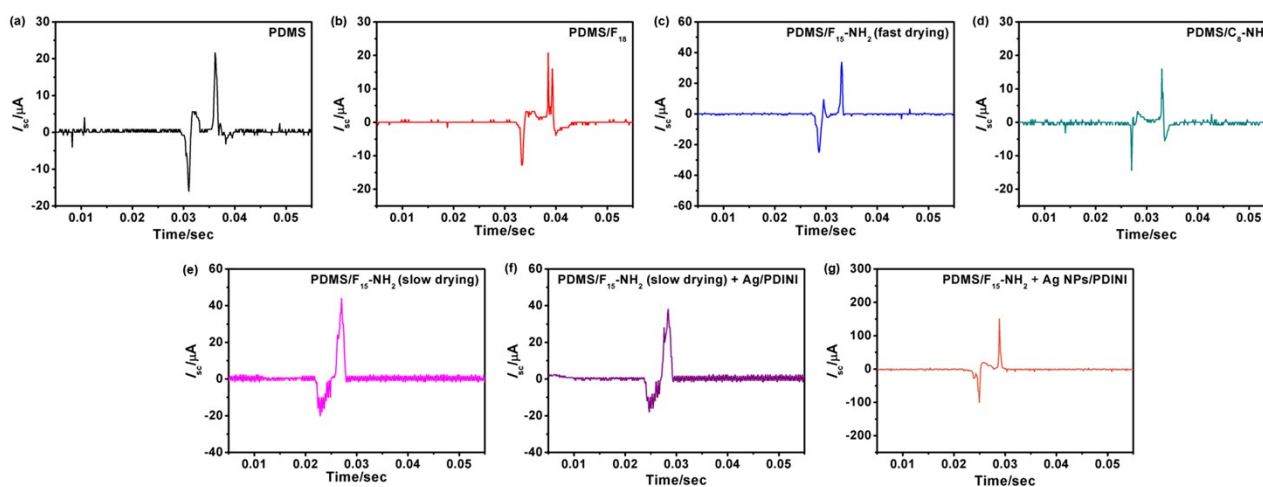

Fig. S15  $I_{sc}$  output of the as-fabricated TENG generated in one cycle.

## References

1. S.-H. Shin, Y. E. Bae, H. K. Moon, J. Kim, S.-H. Choi, Y. Kim, H. J. Yoon, M. H. Lee and J. Nah, *ACS Nano*, 2017, **11**, 6131-6138
2. H. Zhu, N. Wang, Y. Xu, S. Chen, M. Willander, X. Cao and Z. L. Wang, *Adv. Funct. Mater.*, 2016, **26**, 3029-3035.
3. J. W. Lee, S. Jung, T. W. Lee, J. Jo, H. Y. Chae, K. Choi, J. J. Kim, J. H. Lee, C. Yang and J. M. Baik, *Adv. Energy Mater.*, 2019, **9**, 1901987.
4. G. Song, Y. Kim, S. Yu, M.-O. Kim, S.-H. Park, S. M. Cho, D. B. Velusamy, S. H. Cho, K. L. Kim and J. Kim, *Chem. Mat.*, 2015, **27**, 4749-4755
5. H. Ryu, J. H. Lee, T. Y. Kim, U. Khan, J. H. Lee, S. S. Kwak, H. J. Yoon and S. W. Kim, *Adv. Energy Mater.*, 2017, **7**, 1700289.
6. C. Park, G. Song, S. M. Cho, J. Chung, Y. Lee, E. H. Kim, M. Kim, S. Lee, J. Huh and C. Park, *Adv. Funct. Mater.*, 2017, **27**, 1701367.
